# Supplementary material for: Impact of tumour growth rate during preceding treatment on tumour response to regorafenib or trifluridine/tipiracil in refractory metastatic colorectal cancer
Source: PubMed Central journal article supplement — ESMO Open. 2019 Nov 26;4(6):e000584. doi: 10.1136/esmoopen-2019-000584 (PMC7001098; doi:10.1136/esmoopen-2019-000584), 2019-11-26
Supplement: esmoopen-2019-000584supp002.pdf [file esmoopen-2019-000584supp002.pdf]

Supplementary Table1: Association between the interval between two CT scans that were used to assess TGR and allocation of patients into the Rapid or Slow Groups

| Group                                                                        | Interval A |      | Interval B              |      | Interval C |      |
|------------------------------------------------------------------------------|------------|------|-------------------------|------|------------|------|
| Interval between two CT scans                                                | ≤ 6 weeks  |      | > 6 weeks and ≤12 weeks |      | > 12 weeks |      |
| N                                                                            | 27         |      | 149                     |      | 68         |      |
| Rapid Group (%)                                                              | 17         | (63) | 83                      | (56) | 32         | (47) |
| Slow Group (%)                                                               | 10         | (37) | 66                      | (44) | 36         | (53) |
| p value (A vs. B) = 0.67; p value (B vs. C) = 0.24, p value (C vs. A) = 0.18 |            |      |                         |      |            |      |
