# Supplementary material for: Impact of tumour growth rate during preceding treatment on tumour response to regorafenib or trifluridine/tipiracil in refractory metastatic colorectal cancer
Source: PubMed Central journal article supplement — ESMO Open. 2019 Nov 26;4(6):e000584. doi: 10.1136/esmoopen-2019-000584 (PMC7001098; doi:10.1136/esmoopen-2019-000584), 2019-11-26
Supplement: esmoopen-2019-000584supp003.pdf [file esmoopen-2019-000584supp003.pdf]

Supplementary Table2: Association between interval from initiation of regorafenib or FTD/TPI to the first CT evaluation and drugs

| Interval from initiation of regorafenib or FTD/TPI to the first CT evaluation |                | ≤ 6 weeks |      | > 6 weeks and ≤12 weeks |      | > 12 weeks |      | p value |
|-------------------------------------------------------------------------------|----------------|-----------|------|-------------------------|------|------------|------|---------|
| Rapid Group                                                                   | REG (N=74)     | 14        | (19) | 49                      | (66) | 11         | (15) |         |
|                                                                               | FTD/TPI (N=59) | 9         | (15) | 39                      | (66) | 11         | (19) |         |
| Slow Group                                                                    | REG (N=58)     | 2         | (4)  | 41                      | (70) | 15         | (26) | 0.91    |
|                                                                               | FTD/TPI (N=53) | 3         | (5)  | 37                      | (71) | 13         | (24) |         |
