# Supplementary figures and images for: Impact of tumour growth rate during preceding treatment on tumour response to regorafenib or trifluridine/tipiracil in refractory metastatic colorectal cancer
Source: PubMed Central journal article supplement — ESMO Open. 2019 Nov 26;4(6):e000584. doi: 10.1136/esmoopen-2019-000584 (PMC7001098; doi:10.1136/esmoopen-2019-000584), 2019-11-26

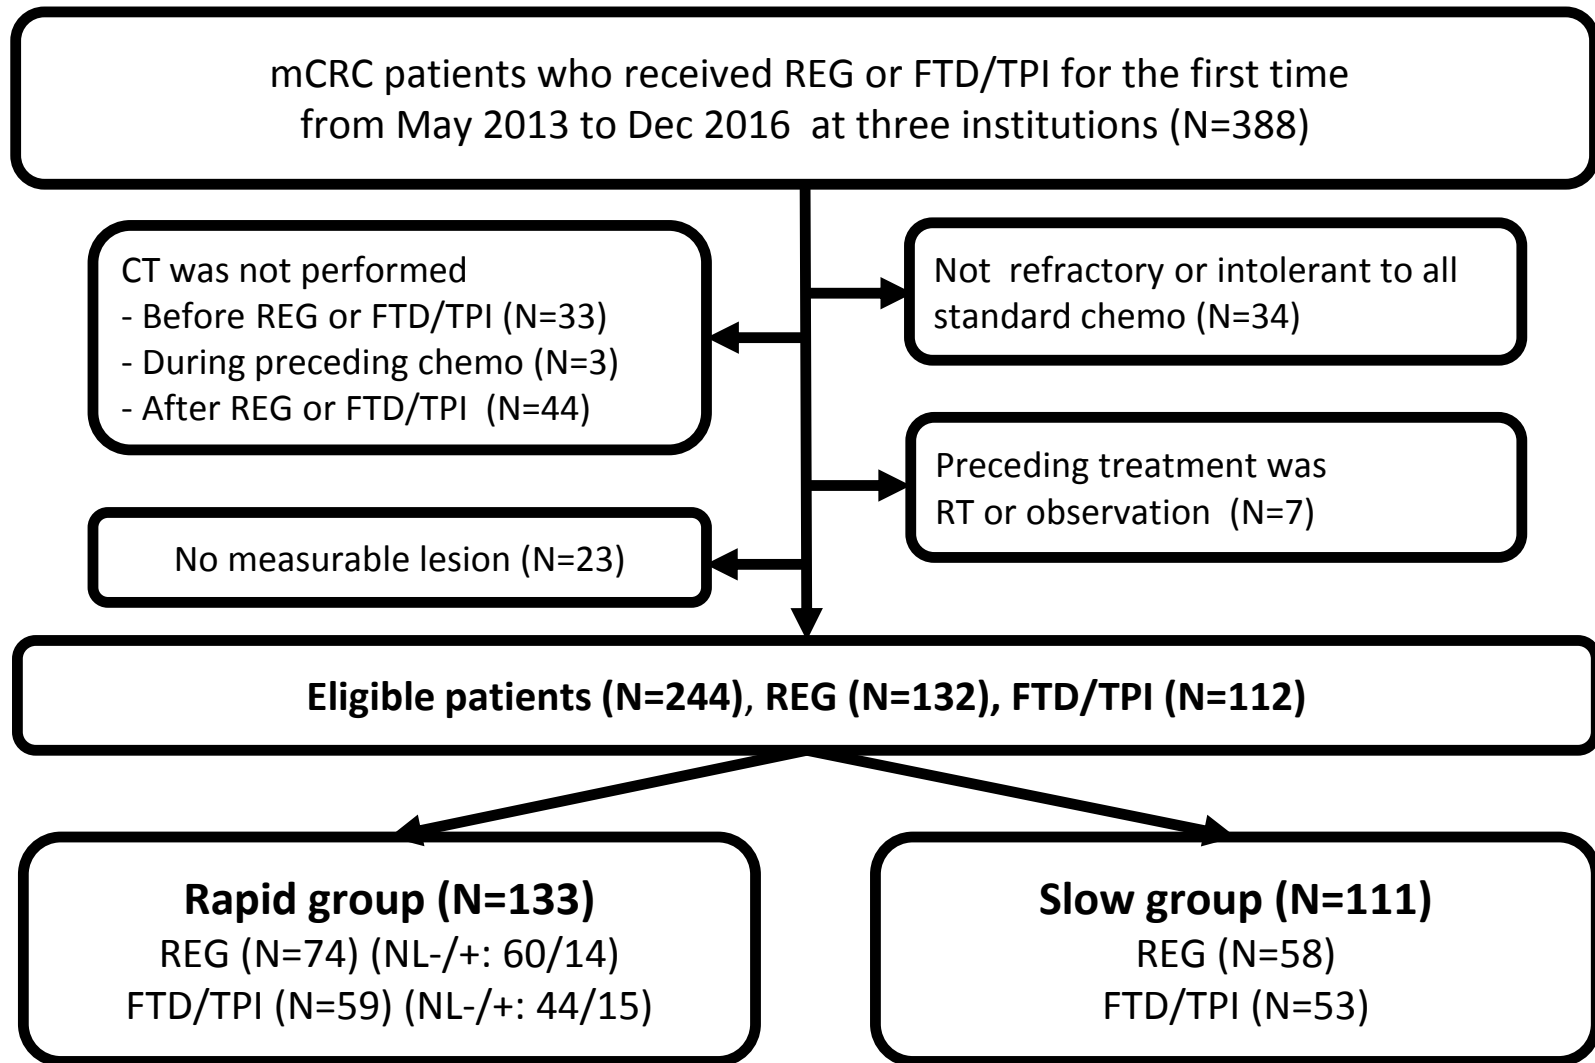

Supplement: esmoopen-2019-000584supp001.pdf [file esmoopen-2019-000584supp001.pdf]

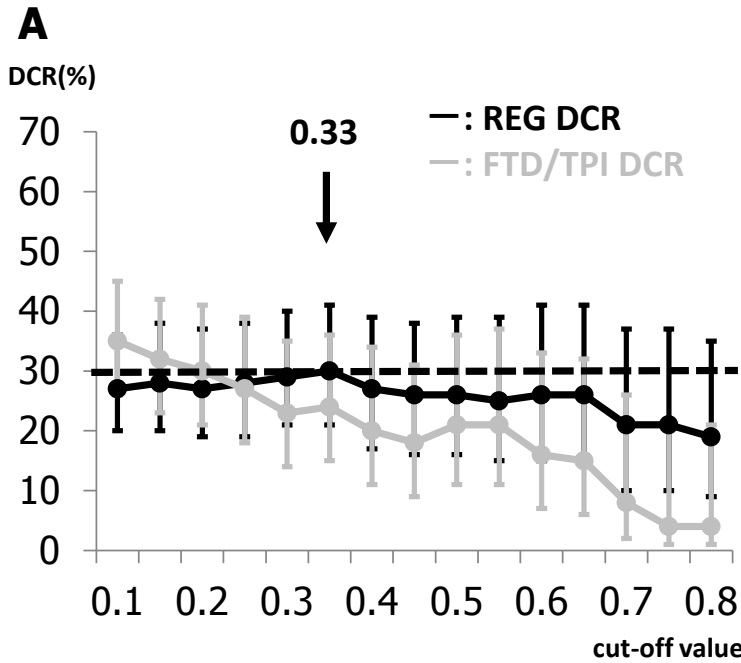

| TGR cut-off | 0.1 | 0.2 | 0.3 | 0.33 | 0.4 | 0.5 | 0.6 | 0.7 | 0.8 |
|-------------|-----|-----|-----|------|-----|-----|-----|-----|-----|
| REGO (N)    | 113 | 95  | 78  | 74   | 60  | 54  | 42  | 34  | 32  |
| TFTD (N)    | 98  | 83  | 61  | 59   | 49  | 39  | 31  | 24  | 23  |

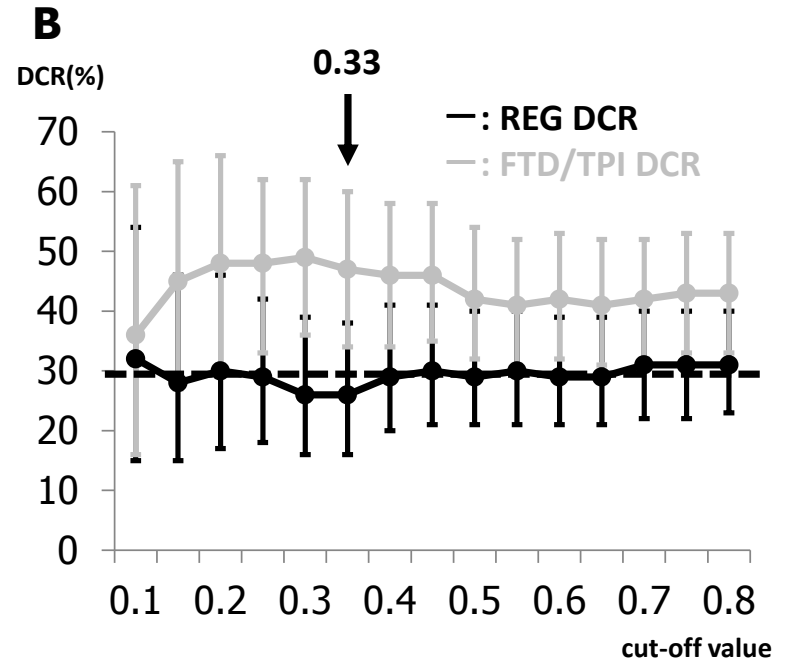

| TGR cut-off | 0.1 | 0.2 | 0.3 | 0.33 | 0.4 | 0.5 | 0.6 | 0.7 | 0.8 |
|-------------|-----|-----|-----|------|-----|-----|-----|-----|-----|
| REG (N)     | 19  | 37  | 54  | 58   | 72  | 78  | 90  | 98  | 100 |
| FTD/TPI (N) | 14  | 29  | 51  | 53   | 63  | 73  | 81  | 88  | 89  |

Supplement: esmoopen-2019-000584supp004.pdf [file esmoopen-2019-000584supp004.pdf]
